# Supplementary material for: Use of a decoration method on silica nanoparticles to determine element-dependent mitochondrial dysfunction
Source: Royal Society of Chemistry journal article supplement (doi:10.1039/c3ra42912a), 2013-01-01
Supplement: c3ra42912a.pdf [file c3ra42912a.pdf]

Supporting Information for

**Use of decoration method on silica nanoparticles to determine  
element-dependent mitochondria dysfunction**

Sojin Kim, Wan-Kyu Oh, Inkyu Lee, and Jyongsik Jang \*

WCU program of Chemical Convergence for Energy and Environment (C2E2), School of  
Chemical and Biological Engineering, College of Engineering, Seoul National University, 599

Gwanak-ro, Gwanak-gu, Seoul 151-742, Korea

[\*] E-mail: [jsjang@plaza.snu.ac.kr](mailto:jsjang@plaza.snu.ac.kr)

Tel.: +82-2-880-7069

Fax: +82-2-888-1604

## 1. Experimental details

### 1.1 Fabrication of nanodomain decorated SiO<sub>2</sub> nanoparticles (ND-SiO<sub>2</sub> NPs)

SiO<sub>2</sub> NPs were prepared by the Stöber method.<sup>1</sup> First, 2.3 mL of tetraethyl orthosilicate (TEOS; Aldrich, St. Louis, MO) was added to the mixture of ethanol (60.0 mL), ammonium hydroxide solution (3.0 mL), and water (1.0 mL). The sol-gel reaction was carried out for 6 h at 55 °C. In order to capture the precursor ions on their surface, 160 mg of SiO<sub>2</sub> NPs were treated with equivalent weight of N-[3-(trimethoxysilyl)-propyl] ethylenediamine (Aldrich, St. Louis, MO) in 1:1 ethanol-water mixture for 12 h. Fabricating NPs (amine-SiO<sub>2</sub> NPs) were then washed several times. Subsequently, 5 mg of amine-SiO<sub>2</sub> NPs was added to the precursor solutions with vigorous stirring for 12 h at 20 °C. To decorate equivalent weight percentage of the NDs on the SiO<sub>2</sub> NPs, the detailed experimental conditions were slightly different between ND types due to their properties and summarized in Table 1. The metal ions (iron, zinc, copper, and cerium ions) were dissolved in ethanol and coordinated with the diamine species on the surface of the SiO<sub>2</sub> NPs. NaOH was introduced dropwise into precursor solutions, and all reactions were carried out for 12 h at RT. In case of SeO<sub>2</sub>, they formed H<sub>2</sub>SeO<sub>3</sub> solutions after dissolving in distilled water. The SeO<sub>3</sub><sup>2-</sup> ions were decorated on the surface of the amine-SiO<sub>2</sub> NP by charge-charge interactions, and reduced by ascorbic acid for 6 h at RT. In case of the MnO<sub>2</sub> NDs, the MnO<sub>4</sub><sup>-</sup> ions, located on the surface of the SiO<sub>2</sub> NPs by charge-charge interactions, were reduced by formamide for 8 h at 40 °C.

The images and the crystallinity of the NDs were acquired by high resolution transmission electron microscopy (HRTEM; JEOL JEM-3010) and X-ray diffraction (XRD; M18XHF SRA, MAC Science Co.), respectively. Size distribution and zeta potential ( $\zeta$ ) of the ND-SiO<sub>2</sub> NPs

were measured by an ELS-8000 instrument (Otsuka Electronics, Japan). The amount of NDs on SiO<sub>2</sub> NPs was investigated using inductively coupled plasma emission spectrometer (ICP-MS; JP/ICPS-7500, Shimadzu). The oxidation state of CeO<sub>2</sub> was confirmed by X-ray photoelectron spectroscopy (XPS; AXIS- His, KRATOS). Dissolution of metal ions from ND-SiO<sub>2</sub> NPs was measured in DI water and cell culture medium as a function of a time using ICP-MS. ND-SiO<sub>2</sub> NPs were suspended in above mentioned solvents with moderate stirring (20 µg mL<sup>-1</sup>). Each sample (0.5 mL) was extracted as a function of a time by centrifugation at 10000 rpm for 5 min. The supernatant was transferred to a fresh vial, diluted 10 times with appropriate solvents, and analyzed by above mentioned ICP-MS.

**Table S1.** Detailed experimental conditions for fabricating ND-SiO<sub>2</sub> NPs

|                     | Precursor and their concentration <sup>a</sup>              | Catalyst or reducing agent and their concentration <sup>a</sup> |
|---------------------|-------------------------------------------------------------|-----------------------------------------------------------------|
| Ce-SiO <sub>2</sub> | Ce(NO <sub>3</sub> ) <sub>3</sub> ·6H <sub>2</sub> O, 10 mM | NaOH, 15 mM                                                     |
| Se-SiO <sub>2</sub> | SeO <sub>2</sub> , 62 mM                                    | Ascorbic acid, 50 mM                                            |
| Cu-SiO <sub>2</sub> | CuCl <sub>2</sub> , 12 mM                                   | NaOH, 24 mM                                                     |
| Fe-SiO <sub>2</sub> | FeCl <sub>3</sub> ·6H <sub>2</sub> O, 12 mM                 | NaOH, 36 mM                                                     |
| Mn-SiO <sub>2</sub> | KMnO <sub>4</sub> , 10 mM                                   | HCONH <sub>2</sub> , 24 mM                                      |
| Zn-SiO <sub>2</sub> | ZnCl <sub>2</sub> , 15 mM                                   | NaOH, 53 mM                                                     |

<sup>a</sup>All of them were purchased from Aldrich and used without further purification.

## 1.2. Three cell lines were used for the nanotoxicological evaluation

Mouse macrophage RAW264.7, rat pheochromocytoma PC12, and calf pulmonary artery endothelial CPAE cell lines were used to investigate the effects of ND-SiO<sub>2</sub> NPs. Macrophages are involved in the first-line immune defense and act as scavengers of foreign agents *via* phagocytosis.<sup>2</sup> PC12 serve as a model system for primary neuronal cells because of their ability

to differentiate in response to nerve growth factors.<sup>3</sup> CPAE are used as blood vessel model system given their origin and ability to respond to vascular endothelial growth factor.<sup>4</sup> A nanotoxicological evaluation using these three cell lines can provide a comprehensive assessment of the toxic effects of ND-SiO<sub>2</sub> NPs on various organs.

### 1.3. Cell culture

Cells were obtained from American Type Culture Collection (ATCC, Manassas, USA). RAW264.7 were cultured in Dulbecco's modified eagle medium (DMEM) with 10% fetal bovine serum (FBS), 1% penicillin-streptomycin solution (P/S solution). PC12 were grown in RPMI-1640 medium with 10% horse serum (HS), 5% FBS, and 1% P/S solution. CPAE were maintained in RPMI-1640 with 10% FBS, and 1% P/S solution. Cells were incubated in a 5% CO<sub>2</sub> incubator at 37 °C (100% humidity).

### 1.4. Internalization of the ND-SiO<sub>2</sub> NPs

Cells were placed in sterile culture dishes (Nunc, Thermo Fisher Scientific, USA) for 24 h, and the ND-SiO<sub>2</sub> NPs (25 µg mL<sup>-1</sup>) were added for another 24 h. After being washed with 0.1 M PBS, cells were prefixed with Karnovsky's fixative (2% paraformaldehyde and 2% glutaraldehyde), postfixed with 1% OsO<sub>4</sub> for 2 h, and stained with 0.5% uranyl acetate for overnight. Dehydration was conducted through a gradient ethanol and propylene oxide. Then, they were infiltrated in Spurr's resin and hardened at 70 °C for 1 day. The sections were stained with 2% uranyl acetate and Reynolds' lead citrate, and cellular internalization of ND-SiO<sub>2</sub> NPs was observed by TEM (JEM1010, JEOL, Tokyo, Japan).

### **1.5. Viability test**

The viability of the ND-SiO<sub>2</sub> NP-treated cells was measured using Cell-Titer glow luminescent cell viability assay (Promega, Madison, WI, USA). This assay is a homogeneous method of estimating the number of viable cells based on amount of adenosine triphosphate (ATP) in metabolically active cells. For the assay,  $1.5 \times 10^4$  cells were seeded in white opaque 96-well plates and treated with different concentrations of the ND-SiO<sub>2</sub> NPs (10, 25, 100, 250, and 500  $\mu\text{g mL}^{-1}$ ) for 24 h. After incubation, supernatant was removed and following steps were carried out as supplier's instructions. Cell viability was detected by Victor<sup>3</sup> Multilabel Readers (Perkin Elmer, Boston, MA, USA).

### **1.6. ROS production and loss of mitochondrial membrane potential (MMP)**

Cells were plated in 6 well plates at a density of  $1 \times 10^5$  cells  $\text{mL}^{-1}$  and treated with ND-SiO<sub>2</sub> NPs (10, 25, 100, 250, and 500  $\mu\text{g mL}^{-1}$ ) each for 24 h. The cells were washed, trypsinized, and collected in tubes. After being resuspended in 0.1 M HBSS (Hank's Buffered Salt Solution), the cells were incubated with MitoSOX (to measure the mitochondrial superoxide) or H<sub>2</sub>DCFDA (to measure total cellular H<sub>2</sub>O<sub>2</sub>) (Invitrogen, Grand Island, NY, USA) at 5  $\mu\text{M}$  concentration for 15 and 30 min at 37 °C, respectively. In case of MMP, cells were stained with 2.5  $\mu\text{g mL}^{-1}$  JC-1 for 30 min at 37 °C. They were analyzed by FACS Aria I (BD Bioscience, USA).

### **1.7. Immunocytochemistry**

As described above,  $1 \times 10^5$  cells were treated with ND-SiO<sub>2</sub> NPs (25  $\mu\text{g mL}^{-1}$ ) for 24 h. Being washed with 0.1 M PBS, the cells were fixed with 4% paraformaldehyde for 20 min,

permeabilized with 0.1% Triton X-100 for 15 min, and blocked with blocking solution (0.1 M PBS, 10% FBS, and 0.03% 1 M  $\text{NaN}_3$ ) for 30 min. Divalent metal transporter 1 antibodies (DMT1; Santa Cruz, USA) were diluted with blocking buffer and incubated with cells for 1 h. Then, the cells were stained with FITC conjugated secondary antibodies for 1 h and analyzed with flow cytometry (FACS Aria I, BD Bioscience, USA).

### **1.8. Apoptosis and necrosis**

As described earlier, cells were seeded and treated with ND-SiO<sub>2</sub> NPs ( $10 \mu\text{g mL}^{-1}$ ) for 24 h. An annexin (aV)/propidium iodide (PI) double staining (Vybrant apoptosis assay kit, Invitrogen, Grand Island, NY, USA) can visualize the apoptotic/necrotic cells, and were conducted as manufacturer's instructions. Live cell images were obtained by Delta Vision RT imaging system (Applied Precision, Issaquah, WA) under CO<sub>2</sub> control (5%) at 37 °C. To obtain apoptosis and necrosis cell images, Cascade II electronmultiplying charge-coupled device (EMCCD) camera was used. For quantification of apoptotic cells,  $25 \mu\text{g mL}^{-1}$  ND-SiO<sub>2</sub> NPs treated cells were stained with ND-SiO<sub>2</sub> NPs, and analyzed using flow cytometry (FACS Aria I, BD Bioscience, USA) at an emission wavelength of 530 nm for aV and 585 nm for PI.

## 2. Size distribution histograms by ELS

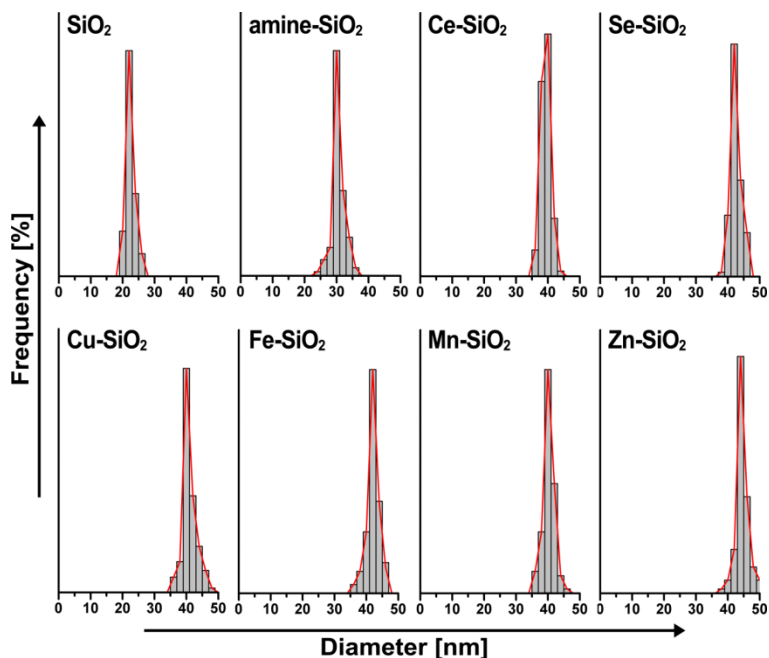

**Fig. S1.** Size distribution histograms of SiO<sub>2</sub>, amine functionalized SiO<sub>2</sub>, and ND-SiO<sub>2</sub> NPs determined by ELS.

Fig. S1 illustrates electrophoretic light scattering spectrophotometer (ELS) histograms of SiO<sub>2</sub>, amine functionalized SiO<sub>2</sub>, and ND-SiO<sub>2</sub> NPs in DI water. Diameter of the SiO<sub>2</sub> NPs, determined by ELS, increased from *ca.* 24 nm to *ca.* 30 nm after silane treatment. The ND-SiO<sub>2</sub> NPs averaged 42 nm in diameter due to NDs on the surface of the SiO<sub>2</sub> NPs. HRTEM images revealed the presence of NDs on the surface of SiO<sub>2</sub> NPs, and each nanodomain was between 4-8 nm in size. The ELS histograms exhibited relatively narrow size distribution of the NPs due to their uniform silica cores, which could be applicable to research for cellular toxicity of the NPs.

### 3. Crystallinity and chemical composition of the ND-SiO<sub>2</sub> NPs

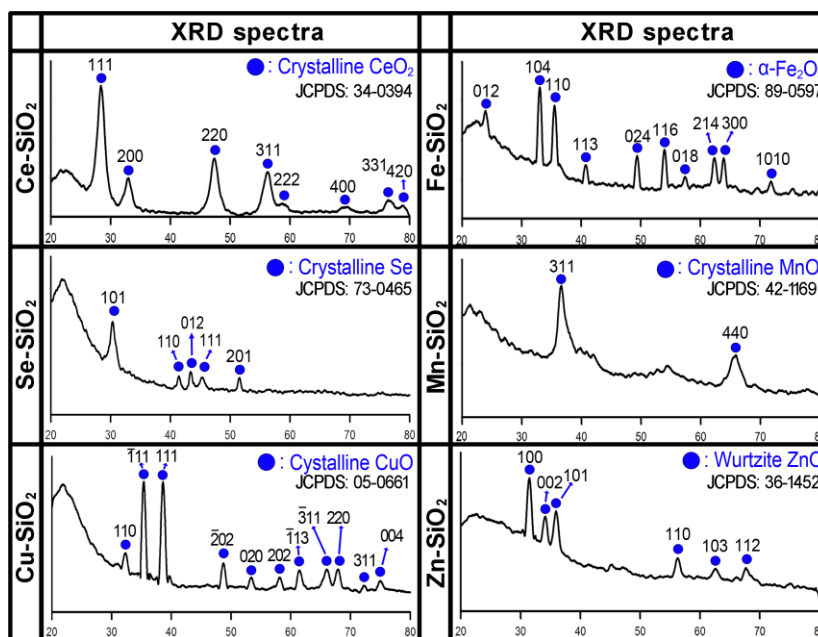

**Fig. S2.** X-ray diffraction (XRD) spectra of ND-SiO<sub>2</sub> NPs

The chemical composition and crystallinity were analyzed by XRD. A broad peak between 20° and 30° showed the amorphous phase of SiO<sub>2</sub> NPs, and other sharp peaks displayed the crystalline phase of the NDs. A crystalline phase was detected without noticeable contaminants, and the chemical compositions of the NDs were determined by these sharp peaks.



#### 4. Characterizations of ND-SiO<sub>2</sub> NPs

**Table S2.** Characterizations of ND-SiO<sub>2</sub> NPs

|                        | Chemical composition <sup>a</sup> | Crystallinity [unit cell] <sup>a</sup> | ζ (mV) <sup>b</sup> | ND ratio (wt%) <sup>c</sup> | Dissolution (%) <sup>d</sup> |                     |
|------------------------|-----------------------------------|----------------------------------------|---------------------|-----------------------------|------------------------------|---------------------|
|                        |                                   |                                        |                     |                             | DI water                     | Medium <sup>e</sup> |
| SiO <sub>2</sub>       | N/A                               | Amorphous                              | -31.50 ± 3.16       | N/A                         | N/A                          | N/A                 |
| amine-SiO <sub>2</sub> | N/A                               | Amorphous                              | 38.05 ± 4.13        | N/A                         | N/A                          | N/A                 |
| Ce-SiO <sub>2</sub>    | CeO <sub>2</sub>                  | Crystalline [Cubic]                    | -16.23 ± 1.13       | 12.69                       | 7.13                         | 1.22                |
| Se-SiO <sub>2</sub>    | Se                                | Crystalline [Trigonal]                 | -45.54 ± 4.25       | 13.28                       | 8.90                         | 2.44                |
| Cu-SiO <sub>2</sub>    | CuO                               | Crystalline [Monoclinic]               | 23.02 ± 3.92        | 12.82                       | 12.60                        | 1.79                |
| Fe-SiO <sub>2</sub>    | Fe <sub>2</sub> O <sub>3</sub>    | Alpha type [Rhombohedral]              | -14.37 ± 3.49       | 12.05                       | 7.30                         | 3.76                |
| Mn-SiO <sub>2</sub>    | MnO <sub>2</sub>                  | Crystalline                            | -11.04 ± 2.23       | 13.36                       | 6.92                         | 0.84                |
| Zn-SiO <sub>2</sub>    | ZnO                               | Wurtzite [Hexagonal]                   | 13.71 ± 1.21        | 12.06                       | 19.74                        | 6.38                |

<sup>a</sup>The crystallinity of ND was determined by XRD spectrum. <sup>b</sup>ζ of the ND-SiO<sub>2</sub> NPs in aqueous solution was measured by ELS-8000. <sup>c</sup>The weight ratio of ND in ND-SiO<sub>2</sub> NPs were analyzed by ICP-MS. <sup>d</sup>Dissolution of the NDs was evaluated using ICP-MS at 37 °C in supernatant of the water and culture mediums for 24 h. <sup>e</sup>DMEM with 10% fetal bovine serum, and 1% penicillin-streptomycin solution was used as culture medium.

The physicochemical properties of the NPs were characterized by XRD, ELS, and ICP-MS (Table S2). The zeta potential (ζ) also provided evidence for the presence of NDs on the NP surface. Bare SiO<sub>2</sub> NPs were negatively charged, whereas the amine-SiO<sub>2</sub> NPs had a positive charge. After formation of the NDs, the ζ of the NPs decreased due to the negative surface charge of the NDs. The amount of ND on the SiO<sub>2</sub> NPs was calculated as an average 12-13 wt% by ICP-MS. This method enabled us to evaluate and compare the precise nanotoxicity of various element NDs on the surface of silica NPs. To the best of our knowledge, this is the first attempt to compare nanomaterials as nanodomain with controlled physical properties on the SiO<sub>2</sub> NPs for

precise nanotoxicity. We further investigated the dissolution of NDs in distilled water and cell culture medium to estimate the effect of dissolved ions on cellular toxicity. About 7-9% of the NDs were leached as ions in distilled water, whereas 12.6% and 19.7% of the Cu-SiO<sub>2</sub> and Zn-SiO<sub>2</sub> NP dissolved, respectively. The dissolution of the NDs was decreased in culture medium due to the colloidal stability effects of the solvents.<sup>5</sup> Dissolved Cu<sup>2+</sup> ions decreased from 12.6% to 1.79%, which was consistent with the other ND-SiO<sub>2</sub> NPs except Zn-SiO<sub>2</sub> NPs. In case of Zn-SiO<sub>2</sub> NP, the released ions was still over 6% even in culture medium. Several papers reported that unlike other nanomaterials, nanosized ZnO undergoes rapid dissolution in cell culture medium, which was good agreement with our results.<sup>6</sup> To compare the dissolution of ND inside of cell organelles, leached metal ions were quantified in a lysosomal buffer solution which is similar condition with lysosomes. In lysosomal buffered solution, *ca.* 40% of Zn<sup>2+</sup> ions was leached from Zn-SiO<sub>2</sub> NPs, which is 6 times higher than in cell culture medium (data not shown). In case of the Zn-SiO<sub>2</sub> NPs, it can be concluded that the effects of ND on SiO<sub>2</sub> NPs are dominant on the Zn-SiO<sub>2</sub> NP toxicity and the metal ion dissolution are considered as minor factor.

## 5. Uptake of ND-SiO<sub>2</sub> NPs

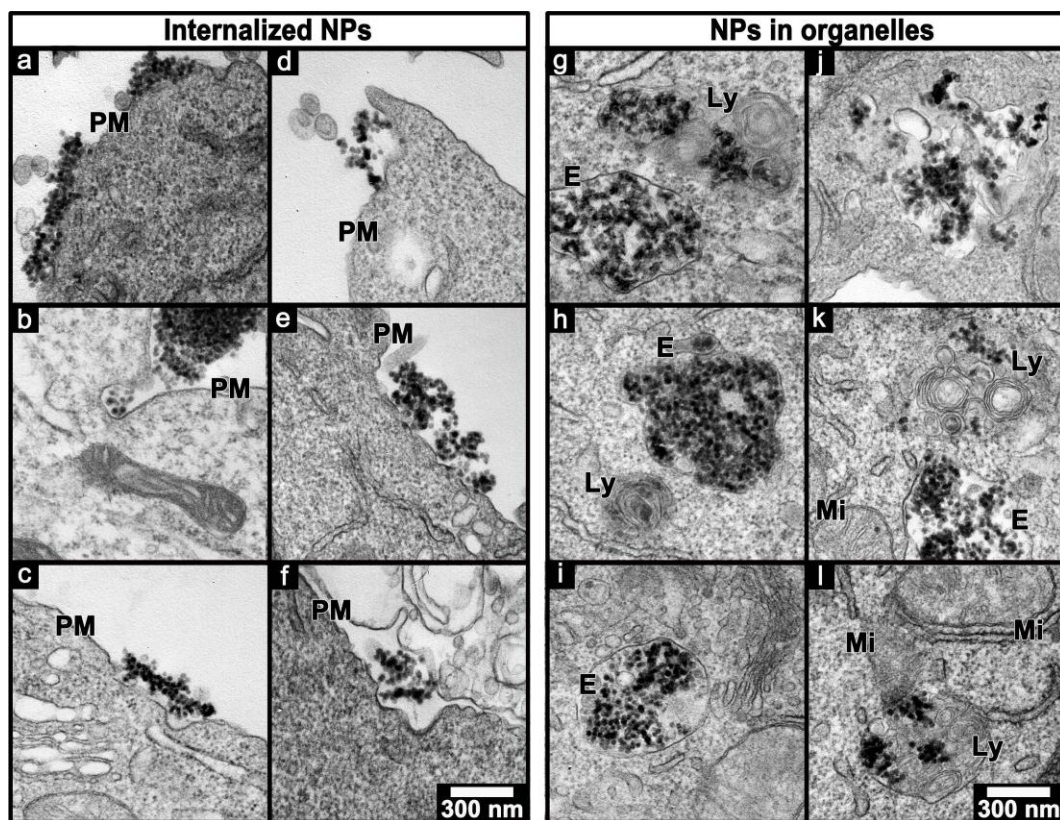

**Fig. S3.** TEM images of RAW264.7 cells treated with 25  $\mu\text{g mL}^{-1}$  of ND-SiO<sub>2</sub> NPs for 24 h. (a, g) Ce-SiO<sub>2</sub>; (b, h) Se-SiO<sub>2</sub>; (c, i) Cu-SiO<sub>2</sub>; (d, j) Fe-SiO<sub>2</sub>; (e, k) Mn-SiO<sub>2</sub>; (f, l) Zn-SiO<sub>2</sub>. Abbreviations: PM, the plasma membrane; E, endosome; Mi, the mitochondria; Ly, the lysosome.

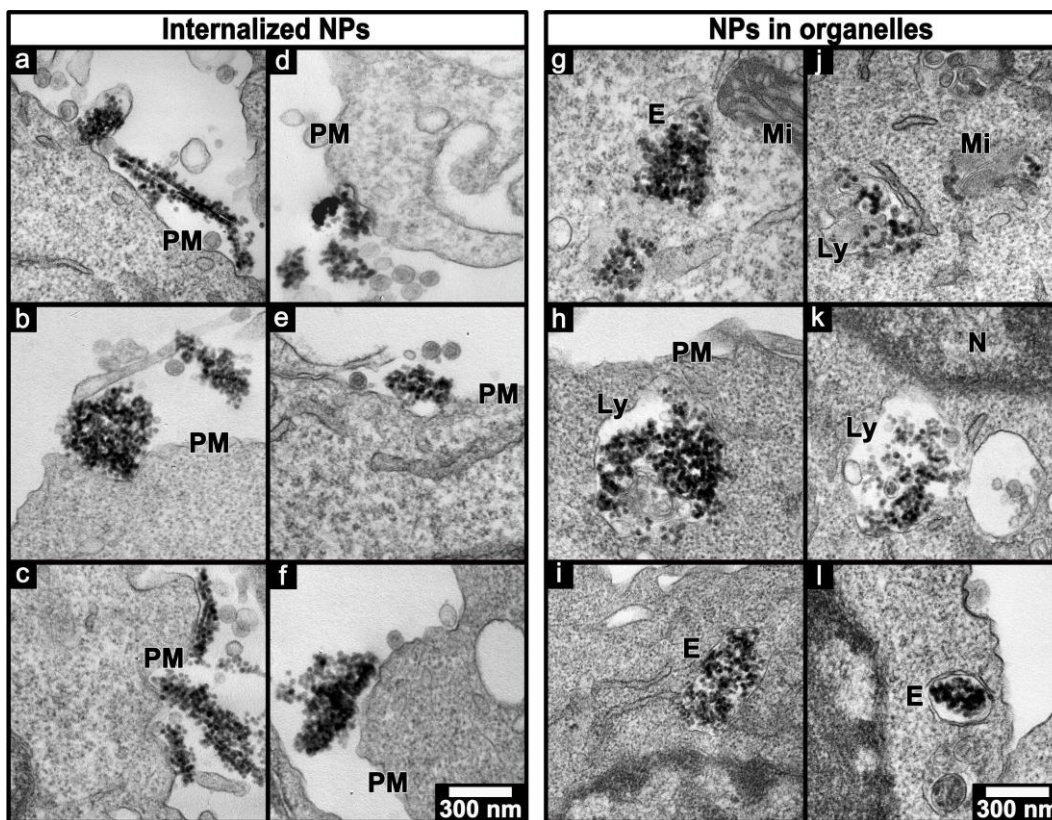

**Fig. S4.** TEM images of PC12 cells treated with  $25 \mu\text{g mL}^{-1}$  of ND-SiO<sub>2</sub> NPs for 24 h. (a, g) Ce-SiO<sub>2</sub>; (b, h) Se-SiO<sub>2</sub>; (c, i) Cu-SiO<sub>2</sub>; (d, j) Fe-SiO<sub>2</sub>; (e, k) Mn-SiO<sub>2</sub>; (f, l) Zn-SiO<sub>2</sub>. Abbreviations: PM, the plasma membrane; N, nucleus; E, endosome; Mi, the mitochondria; Ly, the lysosome.



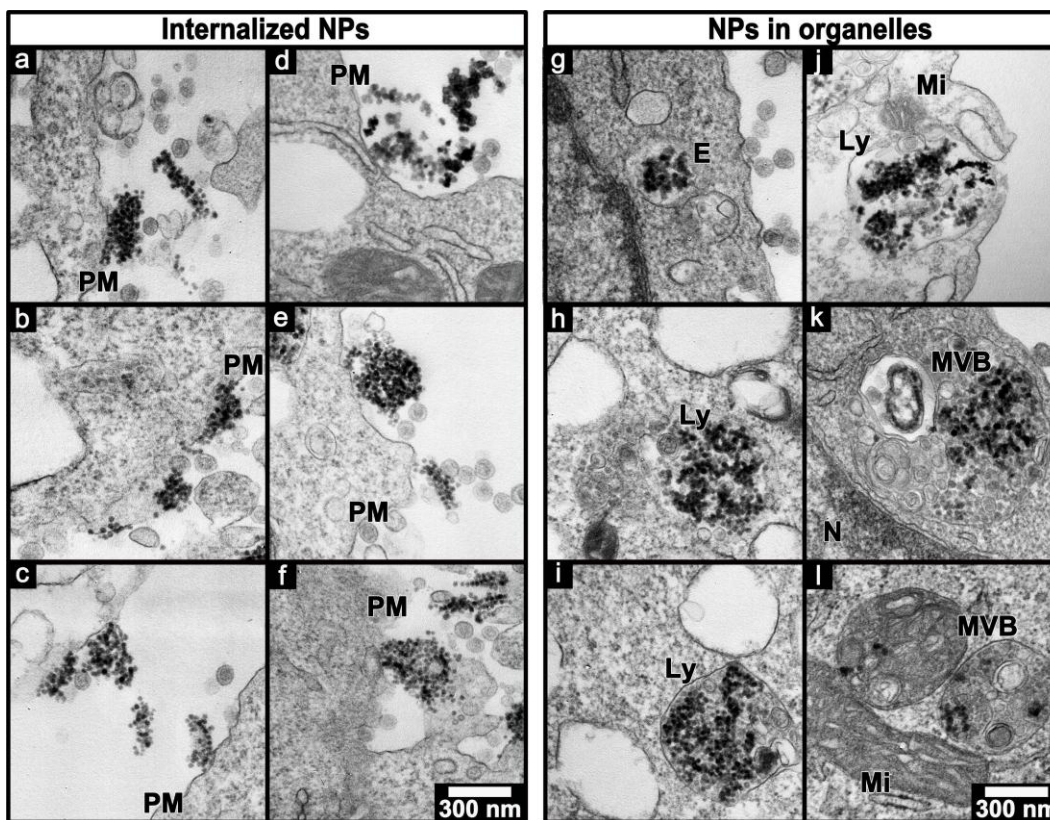

**Fig. S5.** TEM images of CPAE cells treated with  $25 \mu\text{g mL}^{-1}$  of ND-SiO<sub>2</sub> NPs for 24 h. (a, g) Ce-SiO<sub>2</sub>; (b, h) Se-SiO<sub>2</sub>; (c, i) Cu-SiO<sub>2</sub>; (d, j) Fe-SiO<sub>2</sub>; (e, k) Mn-SiO<sub>2</sub>; (f, l) Zn-SiO<sub>2</sub>. Abbreviations: PM, the plasma membrane; N, nucleus; E, endosome; Mi, the mitochondria; MVB, multivesicular bodies; Ly, the lysosome.

The cellular uptake of ND-SiO<sub>2</sub> NPs was observed by TEM, and representative images are shown (Fig. S3-S5). Clustered NPs were attached to the plasma membrane, and internalized NPs were distributed throughout the cytoplasm. No significant difference in cellular uptake was observed among the cell-type and ND-type. Invaginations of the cell plasma membrane were observed during ND-SiO<sub>2</sub> NPs internalization. Invagination and protrusion of the plasma membranes denote endocytosis and macropinocytosis, respectively. Thus, both mechanisms were used simultaneously for cellular uptake of ND-SiO<sub>2</sub> NPs. Internalized nanomaterials are delivered from the plasma membrane to several organelles *via* multiple pathways, but the exact mechanism has not been determined.<sup>7, 8</sup>

ND-SiO<sub>2</sub> NPs were found in endosomes, multivesicular bodies, and lysosomes, indicating that most of the internalized ND-SiO<sub>2</sub> NPs were transported *via* the endosome network which consists of endosomes, multivesicular bodies, and lysosomes. The ND-SiO<sub>2</sub> NPs did not penetrate into nor interact with the Golgi apparatus or the nucleus. ~~After internalization, most of the internalized ND-SiO<sub>2</sub> NPs were transported *via* the endosome network which consists of endosomes, multivesicular bodies, and lysosomes.~~ This result was consistent with the cellular uptake model suggested by previous reports.<sup>9</sup> Interestingly, some of lysosomes containing the ND-SiO<sub>2</sub> NPs were damaged, swelled (the blue arrow in Fig. 2c), and even ruptured (the black arrow in Fig. 2c). Several studies have reported that NPs in lysosome undergo intracellular excretion by lysosomal rupture.<sup>10</sup> The pH inside the lysosomes is 4.7, which is capable of ionizing NDs on the surface of SiO<sub>2</sub> NPs.<sup>11</sup> Some of the metal ions passed through the lysosomal membrane and were released into the cytosol, but the remaining ions have the potential to cause lysosomal damages, swelling, even rupture. When NPs were released from the lysosome to the cytoplasm through the ruptured membrane, the released ND-SiO<sub>2</sub> NPs were freely dispersed and moved to the mitochondria.<sup>8</sup> In case of the mitochondria which are distant from the NPs, cristae and intact outer membrane structure was clearly observed (red arrows in Fig. 2b). However, when the Fe-SiO<sub>2</sub> NPs, released from the lysosomes, existed near the mitochondria (yellow arrows in Fig. 2d), the half of mitochondria outer membrane was disappeared (Fig. 2d). Compared with Fig. 2b and 2d, the mitochondria near the NPs appeared to be damaged, suggesting that the released NPs might have affected mitochondria function. Therefore, we focused on the mitochondrial dysfunction affected by ND-SiO<sub>2</sub> NPs.

## 6. Classification of the ND-SiO<sub>2</sub> NPs

**Table S3.** Classification of the ND-SiO<sub>2</sub> NPs according to their toxicity

| Species  | Origin | Group I <sup>a</sup> | Group II <sup>b</sup>                                             | Group III <sup>c</sup>                                            |
|----------|--------|----------------------|-------------------------------------------------------------------|-------------------------------------------------------------------|
|          |        |                      | Se-SiO <sub>2</sub>                                               |                                                                   |
| RAW264.7 | Mouse  | Ce-SiO <sub>2</sub>  | Cu-SiO <sub>2</sub><br>Fe-SiO <sub>2</sub><br>Mn-SiO <sub>2</sub> | Zn-SiO <sub>2</sub>                                               |
| PC12     | Rat    | Ce-SiO <sub>2</sub>  | Se-SiO <sub>2</sub><br>Cu-SiO <sub>2</sub><br>Fe-SiO <sub>2</sub> | Mn-SiO <sub>2</sub><br>Zn-SiO <sub>2</sub>                        |
| CPAE     | Calf   | Ce-SiO <sub>2</sub>  | Se-SiO <sub>2</sub><br>Cu-SiO <sub>2</sub>                        | Fe-SiO <sub>2</sub><br>Mn-SiO <sub>2</sub><br>Zn-SiO <sub>2</sub> |

<sup>a</sup>The Group I is less cytotoxic than that of bare SiO<sub>2</sub> NPs. <sup>b</sup>The Group II shows similar toxicity to bare SiO<sub>2</sub> NPs. <sup>c</sup>The Group III is more toxic than that of bare SiO<sub>2</sub> NPs.

## 7. Mitochondria dysfunction by the Group III treatments

Among the metal ions in Group III,  $\text{Zn}^{2+}$  can affect cellular respiration by interfering with cytochrome *bcl* (complex III) and cytochrome *c* oxidase (complex IV) complexes of the mitochondrial respiratory electron transport chain and can inhibit  $\alpha$ -ketoglutarate-simulated respiration.<sup>12</sup> The produced  $\text{O}_2^{\cdot-}$  by causing mitochondrial dysfunction can generate  $\text{ONOO}^-$ , which in turn amplifies the oxidation of Zn-S bridges in metallothionein, a major  $\text{Zn}^{2+}$  reservoir, and thus generations additional  $\text{Zn}^{2+}$ .<sup>13</sup> Moreover, the  $\text{Zn}^{2+}$ , similar to  $\text{Ca}^{2+}$ , has a direct effect on mitochondria by inducing the opening of the mitochondrial permeability transition pore and release of cytochrome *c* from mitochondria, thereby disrupting mitochondrial function.<sup>13</sup>

$\text{Mn}^{2+}$  enter mitochondria *via* the  $\text{Ca}^{2+}$  uniporter and interfere with cellular respiration by inhibiting both F1-ATPase and the citric acid cycle enzyme aconitase.<sup>14</sup> Additionally,  $\text{Mn}^{2+}$  directly inhibits  $\text{Na}^+$ -dependent and -independent  $\text{Ca}^{2+}$  transporters in the mitochondrial membrane, causing activation of the mitochondrial permeability transition pore and cytochrome *c* release.<sup>15</sup> The  $\text{Fe}^{2+}/\text{Fe}^{3+}$  redox potential is compatible with the constraints of the cellular environment; however, this property converts iron into a potential biohazard.<sup>16, 17</sup> Owing to the redox and catalytic properties of iron, its toxicity is based primarily on ROS generation.

$\text{Fe}^{2+}$  can cross the mitochondria membrane and react with hydrogen peroxide and oxygen, generating highly reactive hydroxyl and superoxide radicals *via* Fenton and Haber–Weiss chemistry.<sup>17</sup> Redox-active iron catalyzes the generation of not only hydroxyl radicals but organic reactive species such as peroxy, or alkoxy radicals. Similar to  $\text{Mn}^{2+}$ ,  $\text{Fe}^{2+}$  ions also inhibit aconitase.<sup>16</sup>



## 8. Cellular protection against exogenous source of ROS by Ce-SiO<sub>2</sub> NPs

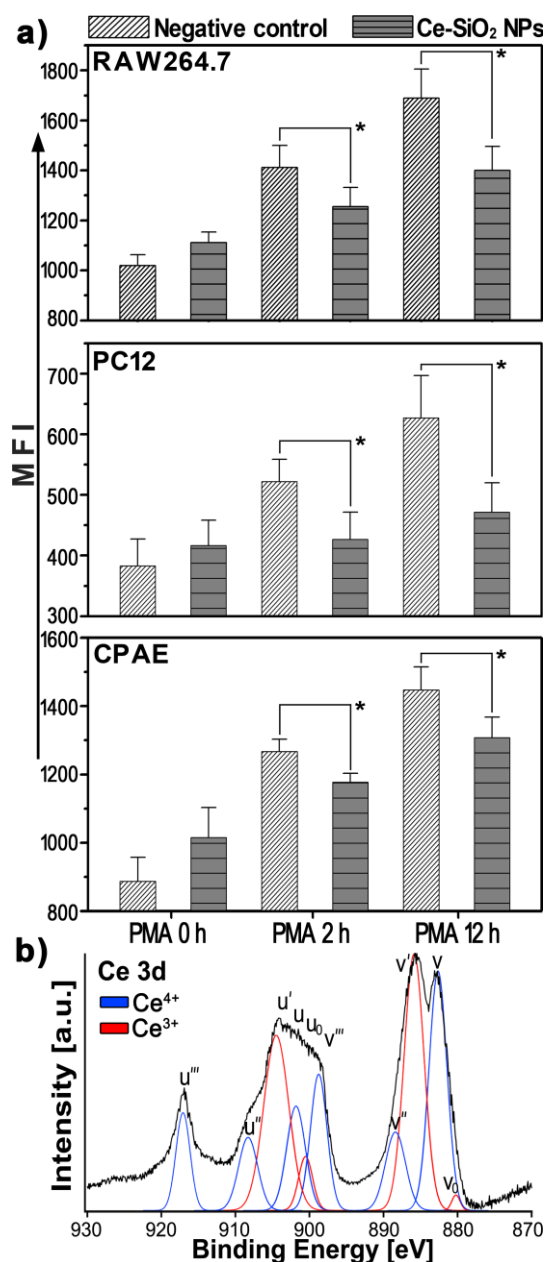

**Fig. S6.** a) Protective effect of the Ce-SiO<sub>2</sub> NPs on PMA induced ROS in the cells. The cells were pretreated with 25  $\mu\text{g mL}^{-1}$  Ce-SiO<sub>2</sub> NPs for 24 h, followed by addition of 1  $\mu\text{g mL}^{-1}$  of PMA for 0, 2, and 12 h. The PMA plays a role as ROS inducer in cells. Among graphs, free of NPs in the cells was used as a negative control. Values exhibit mean  $\pm$  SD and independent experiments were performed three times ( $n=3$ ). The asterisk (\*) denoted a statistically significant difference from the bare-SiO<sub>2</sub> treated cells to the ND-SiO<sub>2</sub> NP treated cells ( $P < 0.05$ ). b) XPS spectrum of Ce-SiO<sub>2</sub> NP. Two sets of spin-orbital multiplets, corresponding to the 3d<sub>3/2</sub> and 3d<sub>5/2</sub>, were labeled as u and v, respectively.

Cells treated with Ce-SiO<sub>2</sub> NPs produced more ATP and less ROS than those treated with SiO<sub>2</sub> NPs (Fig. 2 and Fig. 3a-c). We hypothesized that CeO<sub>2</sub> on the SiO<sub>2</sub> NPs could also protect cells against oxidative damages from an exogenous ROS source. To verify this hypothesis, cells were pretreated with 25 μg mL<sup>-1</sup> of Ce-SiO<sub>2</sub> NPs for 24 h, followed by treatment with phorbol 12-myristate 13-acetate (PMA; 1 μg mL<sup>-1</sup>) for 0, 2, and 12 h. A previous work has shown that PMA are inducing intracellular ROS generation.<sup>18</sup> As shown in Fig. S6a, ROS production was greater in the Ce-SiO<sub>2</sub> NP-treated cells than in the control at 0 h of PMA treatment. However, treatment with PMA decreased ROS generation in the Ce-SiO<sub>2</sub> NP-incubated cells. When the Ce-SiO<sub>2</sub> NPs and PMA were added simultaneously to the cells in a control experiment, no particular protective effect was observed (data not shown). Therefore, the Ce-SiO<sub>2</sub> NPs had to be internalization prior to the addition of PMA to achieve a protective effect. These results suggest that CeO<sub>2</sub> NDs SiO<sub>2</sub> NPs can reduce not only SiO<sub>2</sub> own toxicity but also ROS production in the presence of an exogenous ROS sources.

Several studies have demonstrated that CeO<sub>2</sub> can scavenge free radicals, resulting in an antioxidant effect in cells.<sup>19</sup> This property is attributable primarily to the reversible Ce<sup>3+</sup>/Ce<sup>4+</sup> redox couple, not the oxygen vacancies.<sup>19</sup> Possible reactions involving radical quenching and redox coupling reaction between Ce<sup>3+</sup> and Ce<sup>4+</sup> are shown below. These equations explained how the Ce<sup>3+</sup>/Ce<sup>4+</sup> mixed oxidation state are required for radical scavenging.

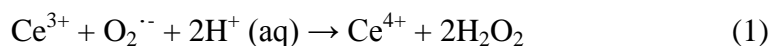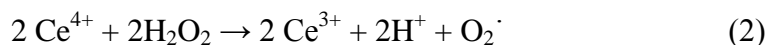

In order to explain the antioxidant effects of CeO<sub>2</sub> NDs on SiO<sub>2</sub> NPs, the oxidation state of CeO<sub>2</sub> was confirmed using XPS analysis (Fig. S6b). The Ce 3d spectra were based on prior research; two sets of spin-orbital multiplets, corresponding to 3d<sub>3/2</sub> and 3d<sub>5/2</sub>, were labeled as u and v, respectively.<sup>20</sup> The Ce 3d spectra of the Ce-SiO<sub>2</sub> NPs were deconvoluted as myriad peaks, indicating that the CeO<sub>2</sub> NDs consisted of a mixture of Ce<sup>3+</sup> and Ce<sup>4+</sup> oxidation states. CeO<sub>2</sub> undergoes easy, fast, and reversible reduction and can readily take up and release oxygen, alternating between CeO<sub>2</sub> and CeO<sub>2-x</sub>.<sup>21</sup> Thus, the protective effects of CeO<sub>2</sub> NDs on SiO<sub>2</sub> NPs originate from its mixed Ce<sup>3+</sup>/Ce<sup>4+</sup> oxidation states, in accordance with reported data. As contrasted with Ce-SiO<sub>2</sub> NPs, other ND-SiO<sub>2</sub> NP had no scavenging ability for free radicals.

## 9. Cell death mechanism

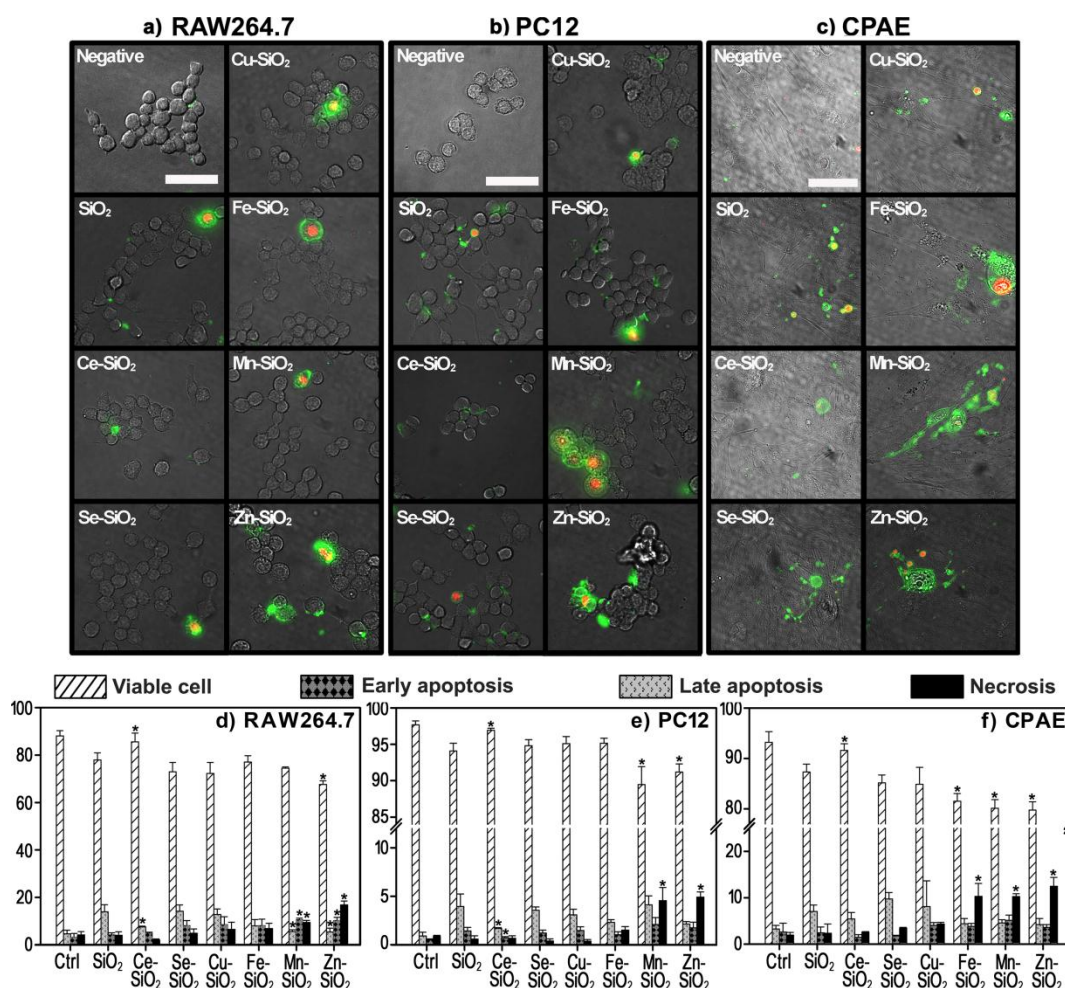

**Fig. S7.** Determination of apoptosis and necrosis by a-c) fluorescence images and d-f) flow cytometric analysis. The cells were treated with ND-SiO<sub>2</sub> NPs (25  $\mu\text{g mL}^{-1}$ ) for 24 h, and stained with annexin V (green)/propidium iodide (red). a-c) Unstained and dual-stained cells were presented viable and late apoptotic cells. The green/red fluorescent labels represent as early apoptotic/necrotic cells (scale bars: 20  $\mu\text{m}$ ). d-f) Apoptosis and necrosis ratio was measured by flow cytometry. Free of the NPs in the cells was used as a control (Ctrl). Values exhibit mean  $\pm$  SD and each experiment was performed in triplicate. The asterisk (\*) denoted a statistically significant difference from the SiO<sub>2</sub> treated cells exposed to the ND-SiO<sub>2</sub> NP treated cells ( $P < 0.05$ ).

## 10. References

1. C. Kim, S. Kim, W.-K. Oh, M. Choi and J. Jang, *Chem. Eur. J.*, 2012, **18**, 4902.
2. S. L. Montes-Fonseca, E. Orrantia-Borunda, A. Aguilar-Elguezabal, C. González Horta, P. Talamás-Rohana and B. Sánchez-Ramírez, *Nanomed. Nanotechnol. Biol. Med.*, 2012, **8**, 853.
3. J. Wu, C. Wang, J. Sun and Y. Xue, *ACS Nano*, 2011, **5**, 4476.
4. S. Y. Hwang, K. W. Kwon, K.-J. Jang, M. C. Park, J. S. Lee and K. Y. Suh, *Anal. Chem.*, 2010, **82**, 3016.
5. T. Xia, M. Kovoichich, M. Liong, L. Mädler, B. Gilbert, H. Shi, J. I. Yeh, J. I. Zink and A. E. Nel, *ACS Nano*, 2008, **2**, 2121.
6. H. Zhang, Z. Ji, T. Xia, H. Meng, C. Low-Kam, R. Liu, S. Pokhrel, S. Lin, X. Wang, Y.-P. Liao, M. Wang, L. Li, R. Rallo, R. Damoiseaux, D. Telesca, L. Mädler, Y. Cohen, J. I. Zink and A. E. Nel, *ACS Nano*, 2012, **6**, 4349; K. H. Müller, J. Kulkarni, M. Motskin, A. Goode, P. Winship, J. N. Skepper, M. P. Ryan and A. E. Porter, *ACS Nano*, 2010, **4**, 6767.
7. A. Nagy, A. Steinbrück, J. Gao, N. Doggett, J. A. Hollingsworth and R. Lyer, *ACS Nano*, 2012, **6**, 4748; T. Hamada, M. Morita, M. Miyakawa, R. Sugimoto, A. Hatanaka, M. d. C. Vestergaard and M. Takagi, *J. Am. Chem. Soc.*, 2012, **134**, 13990.
8. Ž. Krpetić, P. Nativo, I. A. Prior and M. Brust, *Small*, 2011, **7**, 1982.
9. S. Kim, W.-K. Oh, Y. S. Jeong, J.-Y. Hong, B.-R. Cho, J.-S. Hahn and J. Jang, *Biomaterials*, 2011, **32**, 2342.
10. E.-J. Yang, S. Kim, J. S. Kim and I.-H. Choi, *Biomaterials*, 2012, **33**, 6858; M. Mahmoudi, S. Laurent, M. A. Shokrgozar and M. Hosseinkhani, *ACS Nano*, 2011, **5**, 7263.
11. J. R. Casey, S. Grinstein and J. Orlowski, *Nat. Rev. Mol. Cell Biol.*, 2010, **11**, 50.

12. S. L. Sensi, H. Z. Yin, S. G. Carriedo, S. S. Rao and J. H. Weiss, *Proc. Natl. Acad. Sci. USA*, 1999, **96**, 2414.
13. E. Bossy-Wetzell, M. V. Talantova, W. D. Lee, M. N. Schölzke, A. Harrop, E. Mathews, T. Götz, J. Han, M. H. Ellisman, G. A. Perkins and S. A. Lipton, *Neuron*, 2004, **41**, 351.
14. K. M. Erikson, K. Thompson, J. Aschner and M. Aschner, *Pharmacol. Ther.*, 2007, **113**, 369.
15. J. A. Roth and M. D. Garrick, *Biochem. Pharmacol.*, 2003, **66**, 1.
16. G. Papanikolaou and K. Pantopoulos, *Toxicol. Appl. Pharmacol.*, 2005, **202**, 199.
17. N. Singh, G. J. S. Jenkins, R. Asadi and S. H. Doak, *Nano Reviews*, 2010, **1**, 5358.
18. J. R. Henderson, D. A. Fulton, C. J. McNeil and P. Manning, *Biosens. Bioelectron.*, 2009, **24**, 3608.
19. I. Celardo, M. De Nicola, C. Mandoli, J. Z. Pedersen, E. Traversa and L. Ghibelli, *ACS Nano*, 2011, **5**, 4537.
20. B. Reddy and A. Khan, *Catal. Surv. Asia*, 2005, **9**, 155.
21. M. S. Wason, J. Colon, S. Das, S. Seal, J. Turkson, J. Zhao and C. H. Baker, *Nanomed. Nanotechnol. Biol. Med.*, 2013, **9**, 558.
